# Supplementary material
Source: PubMed Central journal article supplement (PMC5827586)
Supplement: ASN.2016090995SupplementaryData2.pdf [file ASN.2016090995SupplementaryData2.pdf]

## **SIGNIFICANCE STATEMENT**

Atypical HUS (aHUS) is a disorder most commonly caused by inherited defects of the alternative pathway of complement, or of proteins that regulate it, and pregnancy can provoke life-threatening episodes of aHUS. The current knowledge base for ideal clinical management of pregnant women with a history of aHUS is small. This manuscript describes nine prospectively followed and 16 retrospectively analyzed pregnancies in 14 women with aHUS. Notably, only a quarter of the 27 pregnancies studied were complicated by episodes of aHUS. Fetal outcomes were excellent in those without antenatal episodes of aHUS. The study shows that the outcome of pregnancies in women with aHUS is much better than commonly appreciated, but follow-up in a specialized unit is recommended.
